# Supplementary material for: Ti3C2Tx nanosheet wrapped core–shell MnO2 nanorods @ hollow porous carbon as a multifunctional polysulfide mediator for improved Li–S batteries
Source: Royal Society of Chemistry journal article supplement (doi:10.1039/d0nr06151d), 2020-01-01
Supplement: d0nr06151d1.pdf [file d0nr06151d1.pdf]

## Supporting Information

Ti<sub>3</sub>C<sub>2</sub>T<sub>x</sub> nanosheet wrapped core-shell MnO<sub>2</sub> nanorods @ hollow porous carbon as a multifunctional polysulfide mediator for improved Li–S battery

Heng Zhang,<sup>‡</sup> <sup>a</sup> Peigen Zhang,<sup>‡</sup> <sup>a</sup> Long Pan,<sup>\*a</sup> Wei He,<sup>a</sup> Qi Qi,<sup>a</sup> Li Yang,<sup>a</sup> Zhuoheng Bao,<sup>a</sup> Wei Zhang,<sup>a</sup> Michel W. Barsoum,<sup>b</sup> and ZhengMing Sun<sup>\*a</sup>

<sup>a</sup> *Key Laboratory of Advanced Metallic Materials of Jiangsu Province, School of Materials Science and Engineering, Southeast University, Nanjing, 211189, China*

<sup>b</sup> *Department of Materials Science and Engineering, Drexel University, PA19104, USA*

*\* Corresponding authors: zmsun@seu.edu.cn (Z.M. S.), panlong@seu.edu.cn (L. P.)*

*‡ These two authors are equal major contributors to this work.*

## **Table of Contents**

1. Supplementary Figures
2. Supplementary Tables
3. Supplementary References

## 1. Supplementary Figures

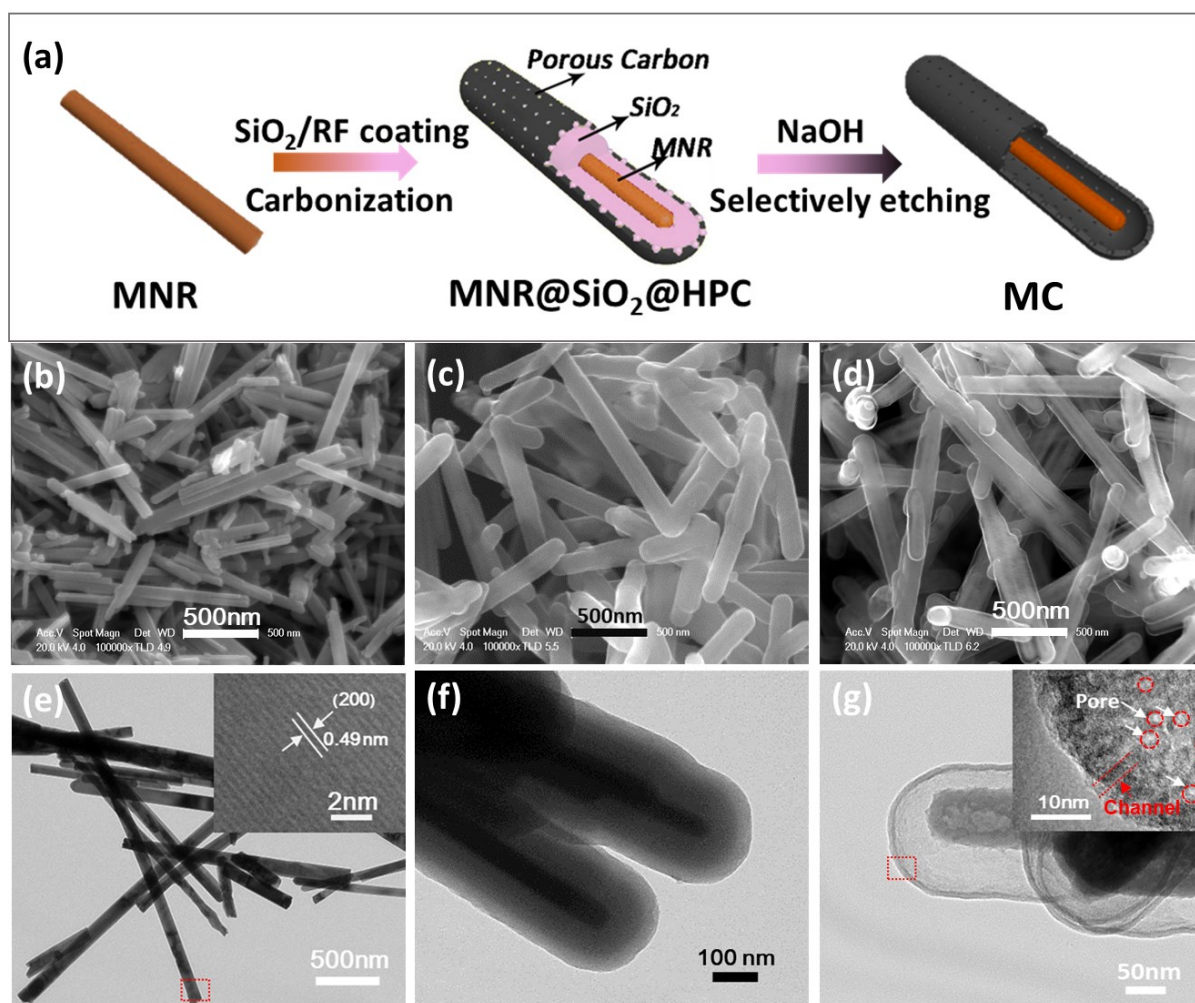

**Fig. S1.** (a) Schematic illustration for synthesis process of core-shell MC. (b-d) SEM images of MNR, MNR@SiO<sub>2</sub>@HPC, and MC. (e-g) TEM images of (e) MNR, (f) MNR@SiO<sub>2</sub>@C and (g) MC.

SEM and TEM images show the MnO<sub>2</sub> nanorods (MNR) have a homogenous lateral size distribution with an average diameter of ~50 nm, and their length scales are in the range of several microns. HRTEM image in the inset of (e) shows that MNR exhibits distinct lattice spacing of 0.49 nm corresponding to the (200) plane of MnO<sub>2</sub> (JCPDS No. 72-1982). After coating with SiO<sub>2</sub> and HPC layers, the average diameter of MNR@SiO<sub>2</sub>@HPC is increased to about 200 nm. By etching the SiO<sub>2</sub> interlayer, the resulting MC shows a yolk-shell structure, in which the morphology of MNR and HPC are well preserved. HRTEM image in the inset of (g) indicates that the HPC shell with a thickness of about 10 nm contains a large number of mesopores with pore size of 3-4 nm. These pores can provide abundant channels for molten sulfur impregnation and Li ion diffusion.

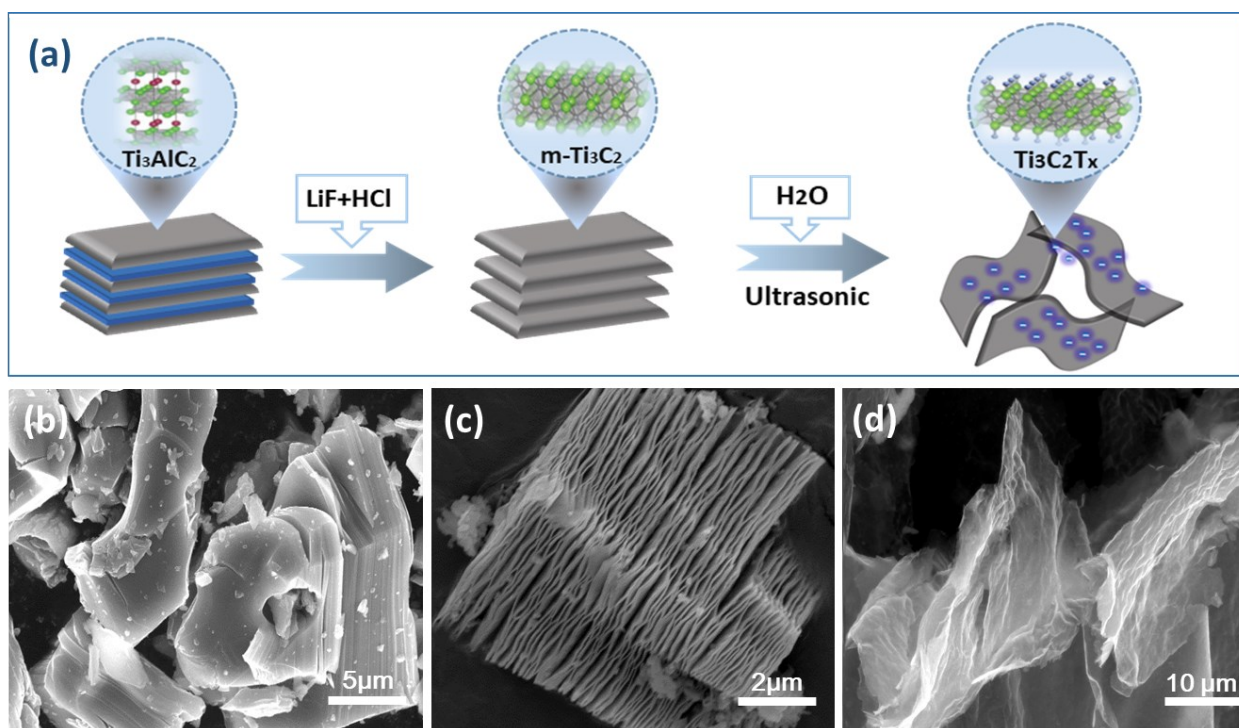

**Fig. S2.** (a) Schematic illustration for the synthesis process of  $Ti_3C_2T_x$ . (b-d) SEM images of MAX ( $Ti_3AlC_2$ ), multilayered- $Ti_3C_2T_x$  ( $m-Ti_3C_2T_x$ ), and  $Ti_3C_2T_x$  nanosheets.

After etching Al atom layers from the dense layered  $Ti_3AlC_2$  bulks, the  $m-Ti_3C_2T_x$  with a typical accordion structure is further delaminated into few-layered, crumpled  $Ti_3C_2T_x$  nanosheets *via* a simple, ultrasonic-assisted liquid exfoliation process.

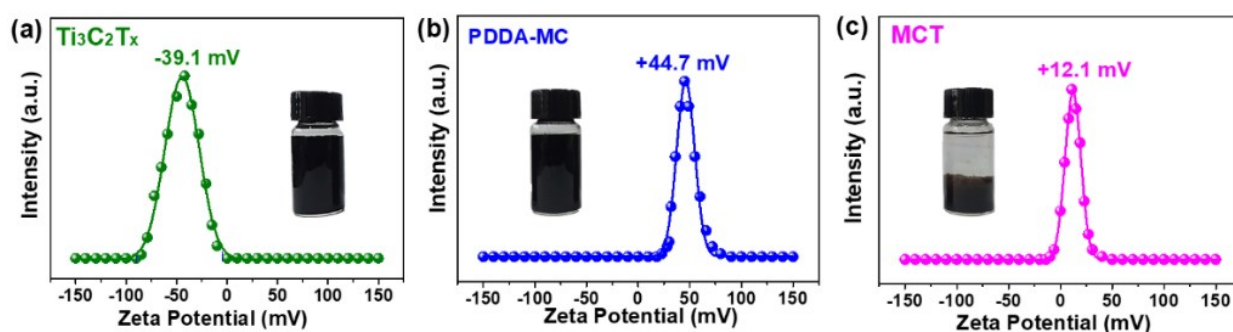

**Fig. S3.** Zeta-potential of (a)  $\text{Ti}_3\text{C}_2\text{T}_x$ , (b) PDDA-MC and (c) MCT. The insets are the photographs of the corresponding suspensions.

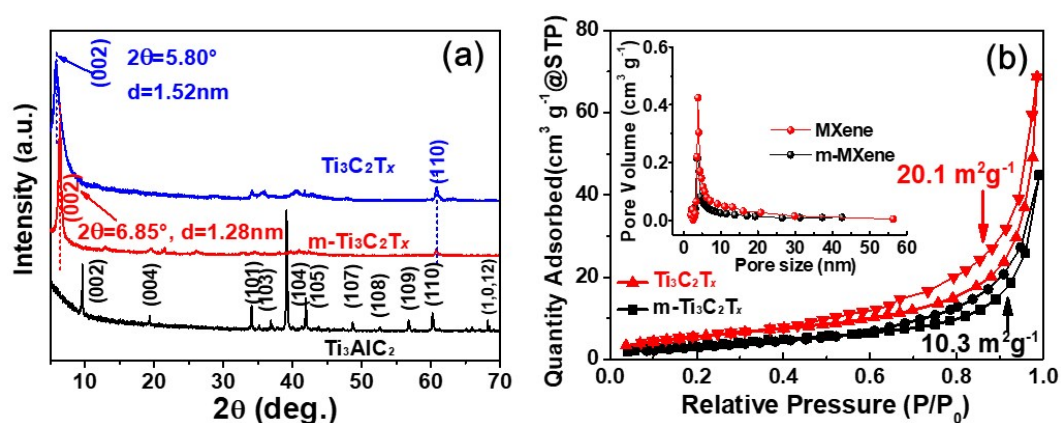

**Fig. S4.** (a) XRD patterns of  $\text{Ti}_3\text{AlC}_2$  MAX,  $\text{m-Ti}_3\text{C}_2\text{T}_x$  and  $\text{Ti}_3\text{C}_2\text{T}_x$ . (b) Nitrogen adsorption/desorption isotherms of  $\text{m-Ti}_3\text{C}_2\text{T}_x$  and  $\text{Ti}_3\text{C}_2\text{T}_x$ . Inset of (b) is the corresponding pore size distributions.

In the XRD patterns, the most prominent (002) reflection of  $\text{m-Ti}_3\text{C}_2\text{T}_x$  located at  $6.85^\circ$  shifts to a lower  $2\theta$  angle of  $5.8^\circ$  in the  $\text{Ti}_3\text{C}_2\text{T}_x$ , resulting in  $\text{Ti}_3\text{C}_2\text{T}_x$  nanosheets have a bigger lattice spacing and more active sites than  $\text{m-Ti}_3\text{C}_2\text{T}_x$ .

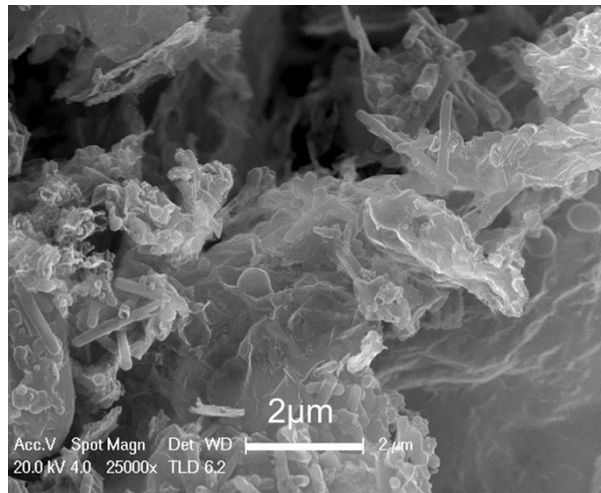

**Fig. S5.** SEM image of the 3D MCT hierarchical structure.

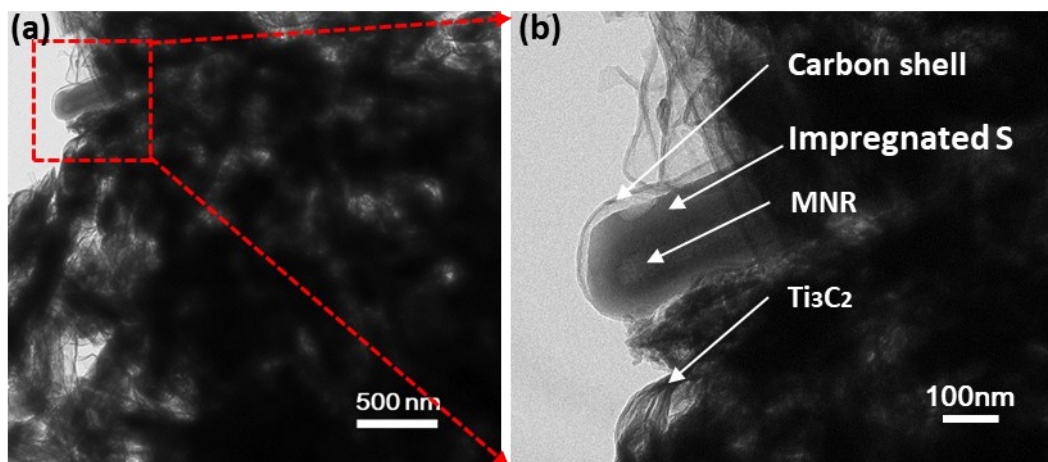

**Fig. S6.** (a, b) TEM images of the MCT/S composite.

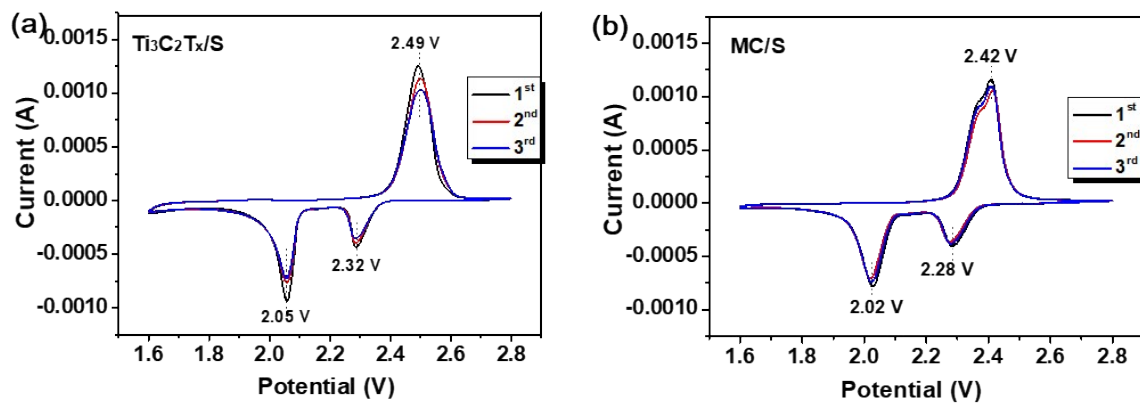

Fig. S7. (a, b) CV curves of the  $\text{Ti}_3\text{C}_2\text{T}_x/\text{S}$  and MC/S cathodes at  $0.1 \text{ mV s}^{-1}$ .

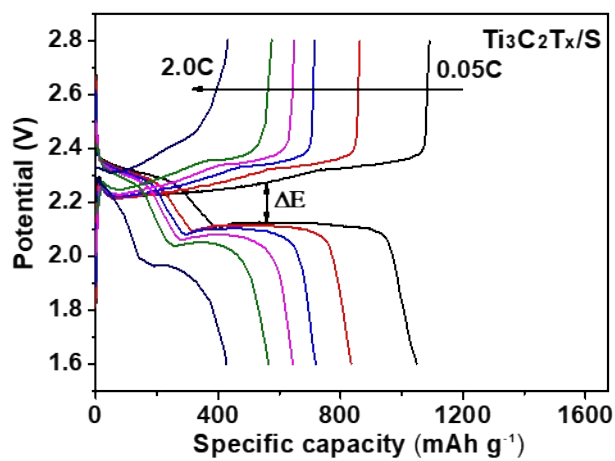

Fig. S8. Charging/discharging curves of the  $\text{Ti}_3\text{C}_2\text{T}_x/\text{S}$  cathode at different current densities.

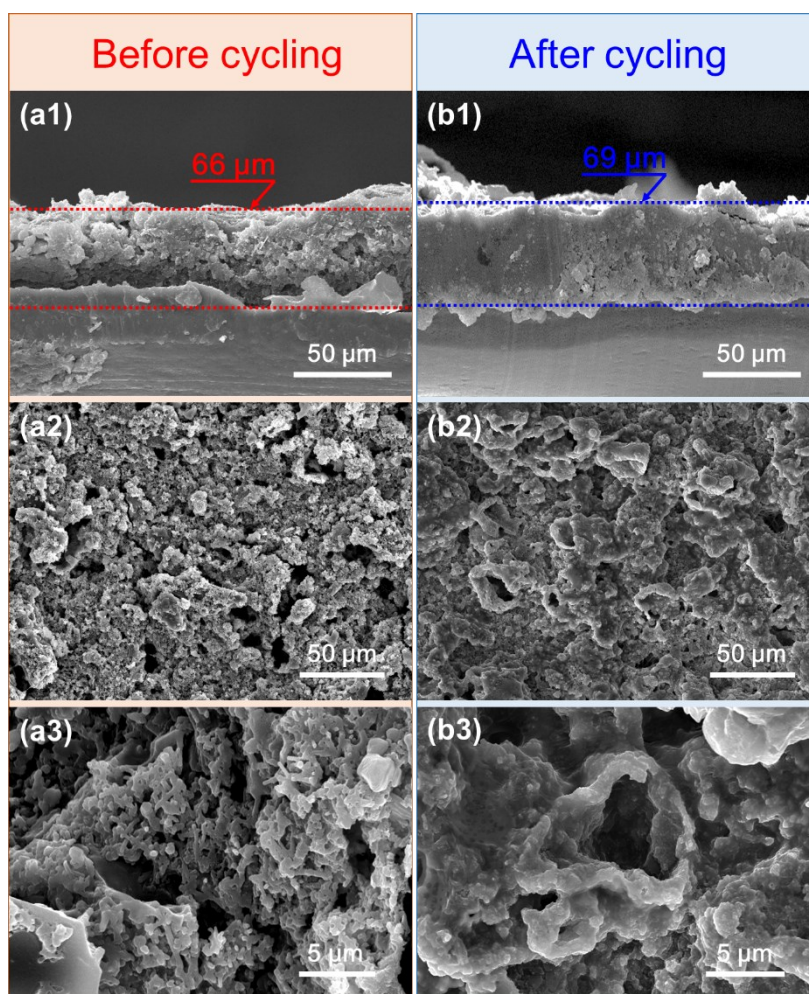

**Fig. S9.** SEM images of MCT/S electrode before (a) and after (b) cycling (200 cycles at 0.2C with a S-mass loading of  $4.15 \text{ mg cm}^{-2}$ ). (a1, b1) Cross section and (a2-b3) top-view SEM images.

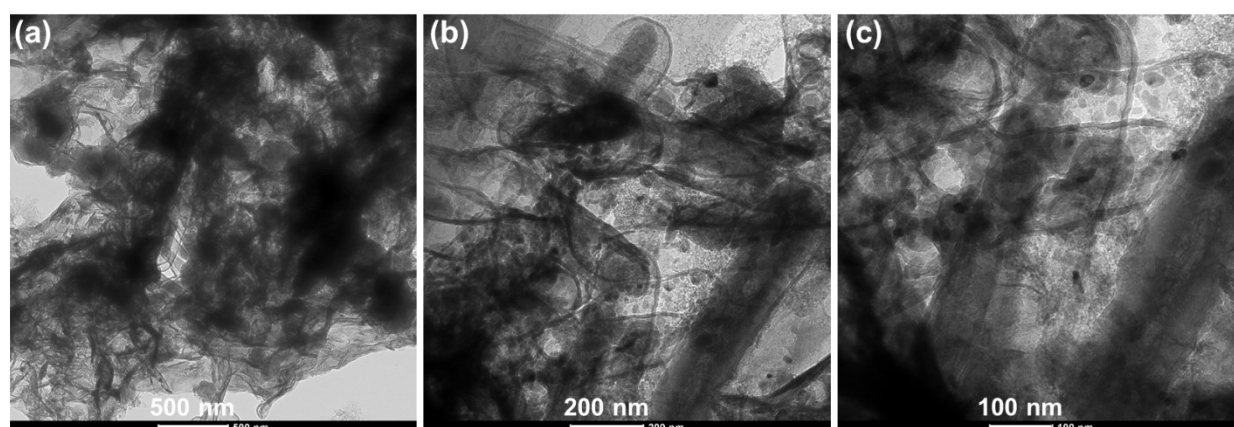

**Fig. S10.** TEM images at different magnification of MCT/S after cycling (200 cycles at 0.2C with a S-mass loading of  $4.15 \text{ mg cm}^{-2}$ ).



## 2. Supplementary Tables

**Table S1.** Comparison of EIS fitting parameters in the equivalent circuit model for MCT/S, MC/S, and  $\text{Ti}_3\text{C}_2\text{T}_x/\text{S}$  cathodes

| Cathodes                                   | $R_e$ ( $\Omega$ ) | $R_{ct}$ ( $\Omega$ ) | CPE <sub>1</sub>               |       | CPE <sub>2</sub>               |       |
|--------------------------------------------|--------------------|-----------------------|--------------------------------|-------|--------------------------------|-------|
|                                            |                    |                       | $Z_{\text{CPE1}}$ ( $\Omega$ ) | $n_1$ | $Z_{\text{CPE2}}$ ( $\Omega$ ) | $n_2$ |
| MCT/S                                      | 2.50               | 24.28                 | $5.10 \times 10^2$             | 0.66  | 29.02                          | 0.57  |
| MC/S                                       | 4.28               | 66.85                 | $3.45 \times 10^3$             | 0.53  | 40.81                          | 0.40  |
| $\text{Ti}_3\text{C}_2\text{T}_x/\text{S}$ | 3.06               | 50.93                 | $1.68 \times 10^3$             | 0.71  | 38.17                          | 0.63  |

$Z_{\text{CPE}}$  is defined as  $Z_{\text{CPE}} = Y^{-1}(j\omega)^{-n}$ . When  $n = 1$ , CPE represents an ideal capacitor with the capacitance  $Y$ ; when  $n = 0$ , CPE is a resistor with the admittance  $Y$ .

**Table S2.** Comparisons among some other advanced sulfur cathodes for Li–S Batteries

| Cathodes                                                             | Host feature              | S content/loading<br>(%/mg cm <sup>-2</sup> ) | Initial capacity<br>(mA h g <sup>-1</sup> /C) | Rate capacity<br>(mA h g <sup>-1</sup> /C) | Cycle life<br>(mA h g <sup>-1</sup> /cycles/C) | Capacity decay<br>(% per cycle) | Ref.      |
|----------------------------------------------------------------------|---------------------------|-----------------------------------------------|-----------------------------------------------|--------------------------------------------|------------------------------------------------|---------------------------------|-----------|
| MCT/S                                                                | 3D hierarchical structure | 75/2.0                                        | 1406/0.05                                     | 740/1.0<br>688/2.0                         | 953/200/1.0<br>591/600/2.0                     | 0.059<br>0.044                  | This work |
| rGO/MnO <sub>2</sub> /S                                              | Aerogel                   | 67/0.8                                        | 1072/0.2                                      | 659/1.6                                    | 887/200/0.2                                    | 0.071                           | [1]       |
| MnO <sub>2</sub> @MXene/S                                            | Aerogel                   | 70/1.2                                        | 1140/0.05                                     | 615/2.0                                    | 731/500/1.0                                    | 0.06                            | [2]       |
| MnO <sub>2</sub> /NHCS/S                                             | Nano-spheres              | 72/1.9                                        | 1283/0.2                                      | 1130/1.0                                   | 1283/500/0.2                                   | 0.067                           | [3]       |
| MnO <sub>2</sub> @GO/S                                               | Double-shelled            | 52/0.6                                        | 976/0.02                                      | 269/1.5                                    | 1160/400/0.35                                  | ~0.14                           | [4]       |
| MnO <sub>2</sub> /GO/CNT/S                                           | 3D architecture           | 80/2.8                                        | 1500/0.05                                     | 960/1.0                                    | 963/100/0.2                                    | 0.162                           | [5]       |
| Ti <sub>3</sub> C <sub>2</sub> /CF/S                                 | 3D framework              | 71/1.2                                        | 1380/0.1                                      | 510/5.0                                    | 581/1000/1.0                                   | 0.044                           | [6]       |
| Ti <sub>3</sub> C <sub>2</sub> /rGO/S                                | 3D hybrid                 | 70.4%/1.5                                     | 1190/0.2                                      | 923/2.0                                    | 1144/300/0.5                                   | ~0.077                          | [7]       |
| Ti <sub>3</sub> C <sub>2</sub> /CNT/S                                | Interwoven                | 83/1.5                                        | 1216/0.05                                     | 1216/0.05                                  | 930/1200/0.5                                   | 0.043                           | [8]       |
| TiO <sub>2</sub> @Ti <sub>3</sub> C <sub>2</sub> /S                  | Nanosheets                | 80/1.5                                        | 1158/0.2                                      | 663/2.0                                    | 850/500/2.0                                    | 0.04                            | [9]       |
| Ti <sub>3</sub> C <sub>2</sub> @PDA/S                                | Particle                  | 78/5.0                                        | 1197/0.5                                      | 590/2.0                                    | 1000/1000/0.2                                  | 0.035                           | [10]      |
| Ti <sub>3</sub> C <sub>2</sub> NDs/S                                 | Nanosheets                | 67.6/1.8                                      | 1609/0.05                                     | 950/2.0                                    | 1085/400/2.0                                   | 0.057                           | [11]      |
| Ti <sub>3</sub> C <sub>2</sub> T <sub>x</sub> /MoS <sub>2</sub> -C/S | Nano-hybrids              | 79/1.0                                        | 1195/0.1                                      | 677/2.0                                    | 799/300/0.5                                    | 0.07                            | [12]      |
| Ti <sub>3</sub> C <sub>2</sub> @rGO/S                                | Aerogel                   | 45/1.57                                       | 1270/0.1                                      | 699/1.0                                    | 596/500/1.0                                    | 0.07                            | [13]      |
| Ti <sub>3</sub> C <sub>2</sub> T <sub>x</sub> /Meso-C/S              | Particle                  | 72.8/2.0                                      | 1225/0.05                                     | 544/4.0                                    | 704/300/0.5                                    | 0.142                           | [14]      |
| S@500-Ti <sub>3</sub> C <sub>2</sub> O <sub>x</sub>                  | Hetero-structure          | 60/-                                          | 1540/0.5                                      | 705/5.0                                    | 662/1000/1.0                                   | 0.08                            | [15]      |
| S@TiO <sub>2</sub> /Ti <sub>2</sub> CT <sub>x</sub>                  | Nano-architecture         | 78/2.0                                        | 1408/0.2                                      | 576/2.0                                    | 464/200/2.0                                    | 0.05                            | [16]      |
| Mo <sub>2</sub> C-CNTs/S                                             | Hybrid                    | 87/1.8                                        | 1438/0.1                                      | 665/5.0                                    | 925/250/0.1                                    | 0.1                             | [17]      |
| Mo <sub>2</sub> C-C/S                                                | Nano-octahedron           | 72/1.1                                        | 1396/0.1                                      | 1050/1.0                                   | 762/600/1.0                                    | 0.046                           | [18]      |

### 3. Supplementary References

- [1] X. Zhao, H. Wang, G. Zhai, G. Wang, *Chem.*, **2017**, *23*, 7037-7045.
- [2] H. Zhang, Q. Qi, P. Zhang, W. Zheng, J. Chen, A. Zhou, W. Tian, W. Zhang, Z. Sun, *ACS Appl. Energy Mater.*, **2019**, *2*, 705-714.
- [3] M. Chen, Q. Lu, S. Jiang, C. Huang, X. Wang, B. Wu, K. Xiang, Y. Wu, *Chem. Eng. J.*, **2018**, *335*, 831-842.
- [4] X.K. Huang, K.Y. Shi, J. Yang, G. Mao, J.H. Chen, *J. Power Sources*, **2017**, *356*, 72–79.
- [5] Y. Li, D. Ye, W. Liu, B. Shi, R. Guo, H. Zhao, H. Pei, J. Xu, J. Xie, *ACS Appl. Mater. Interfaces*, **2016**, *8*, 28566-28573.
- [6] Q. Jin, L. Li, H. Wang, H. Gao, C. Zhu and X. Zhang, *Electrochimica Acta*, **2019**, *312*, 149-156.
- [7] W. Bao, X. Xie, J. Xu, X. Guo, J. Song, W. Wu, D. Su, G. Wang, *Chem.*, **2017**, *23*, 12613-12619.
- [8] X. Liang, Y. Rangom, C.Y. Kwok, Q. Pang, L.F. Nazar, *Adv. Mater.*, **2017**, *29*, 1603040.
- [9] X.T. Gao, Y. Xie, X.D. Zhu, K.N. Sun, X.M. Xie, Y.T. Liu, J.Y. Yu, B. Ding, *Small*, **2018**, *14*, 1802443.
- [10] X. Wang, C. Yang, X. Xiong, G. Chen, M. Huang, J.-H. Wang, Y. Liu, M. Liu, K. Huang, *Energy Storage Mater.*, **2019**, *16*, 344-353.
- [11] Z. Xiao, Z. Li, P. Li, X. Meng, R. Wang, *ACS Nano*, **2019**, *13*, 3608-3617.
- [12] Y. Zhang, Z. Mu, C. Yang, Z. Xu, S. Zhang, X. Zhang, Y. Li, J. Lai, Z. Sun, Y. Yang, Y. Chao, C. Li, X. Ge, W. Yang and S. Guo, *Adv. Funct. Mater.*, **2018**, *28*, 1707578.
- [13] J. Song, X. Guo, J. Zhang, Y. Chen, C. Zhang, L. Luo, F. Wang, G. Wang. *J. Mater. Chem. A* **2019**; *7*, 6507-6513.
- [14] W. Bao, D. Su, W. Zhang, X. Guo, G. Wang, *Adv. Funct. Mater.* **2016**, *26*, 8746–8756.
- [15] H. Pan, X. Huang, R. Zhang, D. Wang, Y. Chen, X. Duan, G. Wen. *Chem. Eng. J.* **2019**, *358*, 1253-1261.
- [16] C. Du, J. Wu, P. Yang, S. Li, J. Xu and K. Song, *Electrochimica Acta*, **2019**, *295*, 1067-1074.
- [17] L. P. Lv, C. F. Guo, W. Sun and Y. Wang, *Small*, **2019**, *15*, 1804338.
- [18] G. Chen, Y. Li, W. Zhong, F. Zheng, J. Hu, X. Ji, W. Liu, C. Yang, Z. Lin, M. Liu, *Energy Storage Mater.*, **2020**, *25*, 547-554.
